# Supplementary material for: Shared decision making for stroke prevention in atrial fibrillation: study protocol for a randomized controlled trial
Source: Springer Nature journal article supplement (doi:10.1186/s13063-017-2178-y), 2017-09-29
Supplement: MOESM4 [file 15095032]

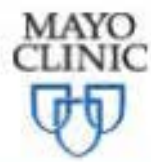

This conversation tool is an online tool intended for use by a patient and clinician together in a clinical encounter in which they are discussing how to respond to the patient's risk of stroke due to nonvalvular atrial fibrillation (AF). The tool is intended to provide a supportive structure and information that patient and clinician may draw on during clinical conversations in various settings e.g. primary care, emergency department, cardiology and other specialty practices.

The tool begins by orienting patient and clinician to the conversation in which it will be used—the management of AF. The tool then moves to a CHA<sub>2</sub>DS<sub>2</sub>-VASc calculator that is used to review the medical situation with the patient. Based on the calculation, the tool then presents the patient's current risk of stroke without anticoagulation over 5 years (default) or 1 year (optional) through a prose description of natural frequencies and a pictogram. This presentation works to develop an initial appreciation of the problem facing patient and clinician—the patient's risk of stroke.

Next, the patient's risk of stroke with anticoagulation (without identifying a particular agent) is presented again through prose description and pictograph. This presentation works to introduce anticoagulation as an option, or hypothesis, for meeting the threat of AF.

Patient and clinician can then make an initial appraisal of this hypothesis and if this appraisal suggests that anticoagulation is worth considering then the tool moves on to introduce two approaches to anticoagulation—Warfarin and Direct Anticoagulants.

Whether and how to anticoagulate as an option or hypothesis is further tested in conversation with support from the tool through consideration of the practical issues involved in bringing anticoagulation into the patient's life (issues of bleeding with anticoagulation, anticoagulation and INR testing in the patient's routine, reversal of anticoagulation, cost, diet and other medications).

These issues are presented through panels that compactly orient patient and clinician to the implications of the two approaches to anticoagulation. The issue of bleeding is supported through four levels of discussion—not all of which need be explored. The first level describes the bleeding events associated with anticoagulation ranging from bruising to the need for emergency treatment for life-threatening bleeding. As the latter is a very serious occurrence, the second level qualifies what this threat means. It does this through presentation of the increased occurrence with anticoagulation, for the average person (HAS-BLED 2), of emergency treatment for bleeding through a prose description and a pictogram. The third level invites reflection on risk factors in the patient's environment and activities. If warranted, a fourth level supports consideration of the patient medical factors that may affect the patient's bleeding risk. This discussion may be handled through review of the HAS-BLED factors, or through use of the included HAS-BLED calculator to determine if the patient is at lower than average risk (HAS-BLED<2), average risk, or higher than average risk.

The tool closes in the decision of whether to respond to this patient's threat of stroke through anticoagulation or not, and if anticoagulation is selected, how anticoagulation will be brought into the patient's life (Warfarin, or a direct anticoagulant). This final screen also contains an editable description of the decision for the medical record, along with the option to print a summary report of the discussion for the patient.

Details on the full developmental process of the ANTICOAGULATION CHOICE conversation tool is described elsewhere.

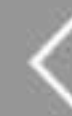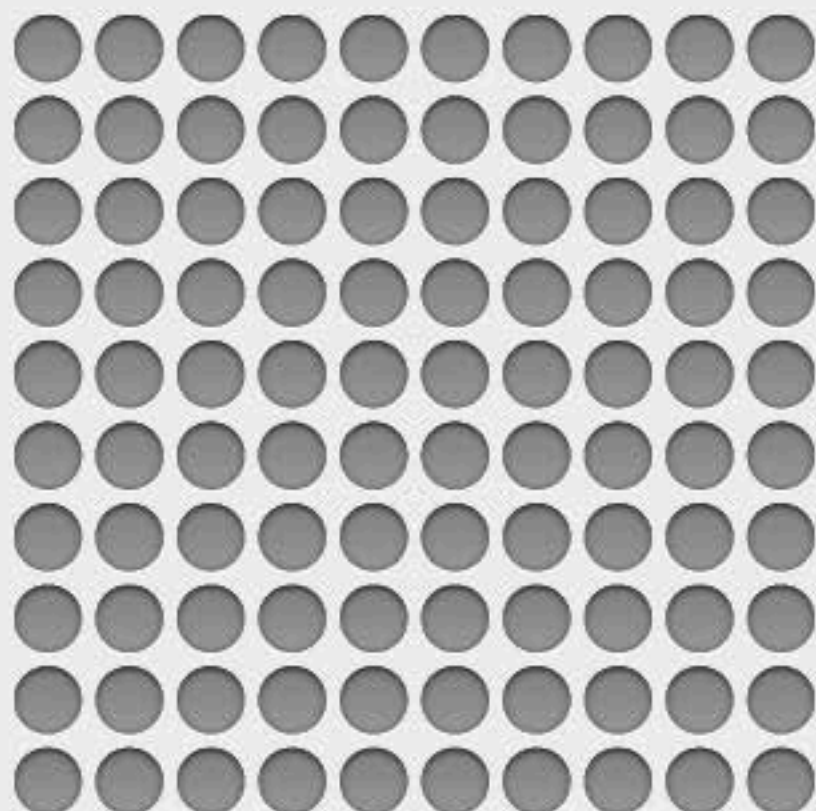

# Welcome to the **Anticoagulation Choice** Decision Aid.

This tool will help you and your doctor discuss  
how to manage your Atrial Fibrillation

**Let's get started**

**Caution:** This application is for use  
exclusively during the clinical encounter  
with your clinician

## Credits & Contacts

[Privacy policy \(Updated October, 2014\)](#) [Terms and conditions of use policy \(Updated February 6, 2015\)](#)

LEGAL CONDITIONS AND TERMS OF USE APPLICABLE TO ALL USERS OF THIS SITE. ANY USE OF THIS SITE CONSTITUTES YOUR AGREEMENT TO THESE TERMS AND CONDITIONS OF USE.

- 1 Year Risk
- 5 Year Risk

To begin, let's review your medical situation

Gender  M  F

Age

History of Hypertension  No

Congestive Heart Failure  No

Stroke / TIA / Thromboembolism  No

History of Vascular Disease  No

Diabetes Mellitus  No

**Continue to consider  
your risk of stroke**

Credits & Contacts

Privacy policy (Updated October, 2014) Terms and conditions of use policy (Updated February 6, 2015)

LEGAL CONDITIONS AND TERMS OF USE APPLICABLE TO ALL USERS OF THIS SITE. ANY USE OF THIS SITE CONSTITUTES YOUR AGREEMENT TO THESE TERMS AND CONDITIONS OF USE.



- 1 Year Risk
- 5 Year Risk

Over the next 5 years

**87** people will have no stroke

**6** people will have a fatal or disabling stroke

**7** people will have a non-disabling stroke

### Current Risk of Stroke without Anticoagulation

In 100 people like you who are not taking an anticoagulant

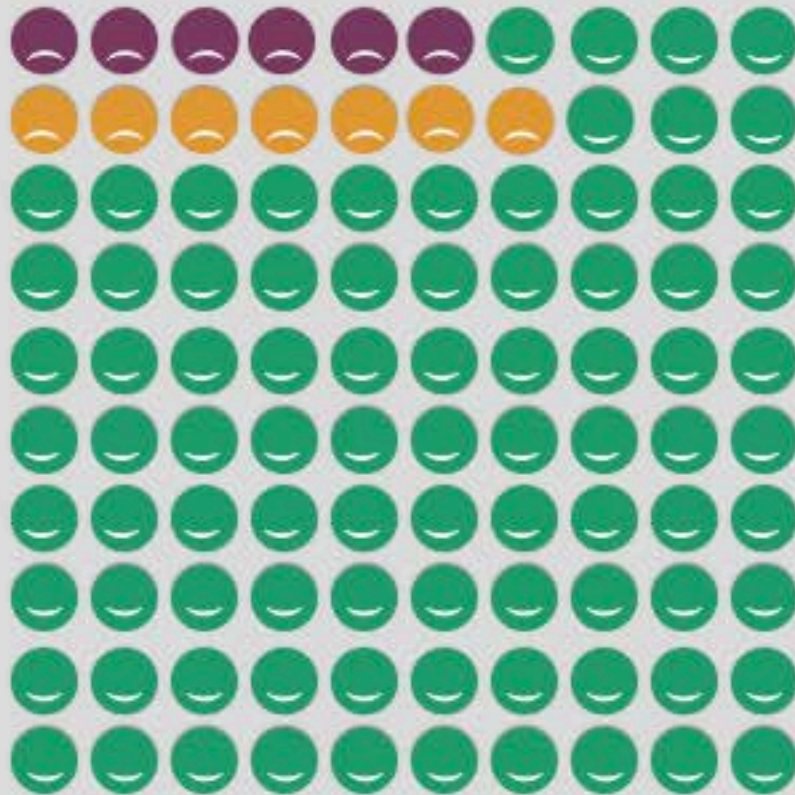

### With Anticoagulation

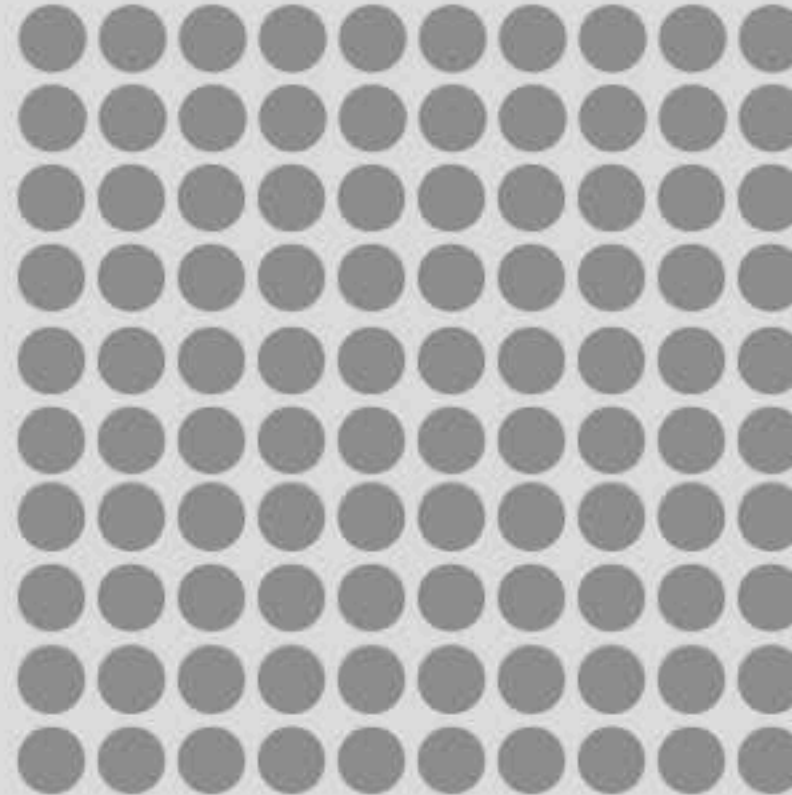

#### Credits & Contacts

Privacy policy (Updated October, 2014) Terms and conditions of use policy (Updated February 8, 2015)

LEGAL CONDITIONS AND TERMS OF USE APPLICABLE TO ALL USERS OF THIS SITE. ANY USE OF THIS SITE CONSTITUTES YOUR AGREEMENT TO THESE TERMS AND CONDITIONS OF USE.



1 Year Risk  
 5 Year Risk

CHA<sub>2</sub>DS<sub>2</sub>-VASC 2

Medical Situation Risk of Stroke **Anticoagulation** Issues

Over the next 5 years

**87** people will have no stroke

**6** people will have a fatal or disabling stroke

**7** people will have a non-disabling stroke

### Current Risk of Stroke without Anticoagulation

In 100 people like you who are not taking an anticoagulant

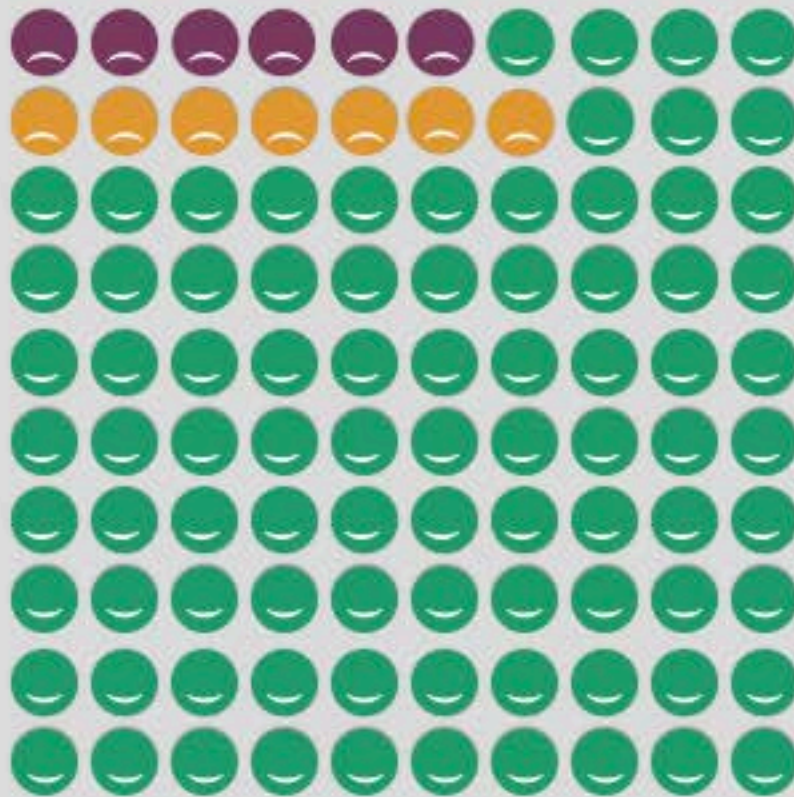

### Future Risk of Stroke with Anticoagulation

In 100 people like you who are taking an anticoagulant

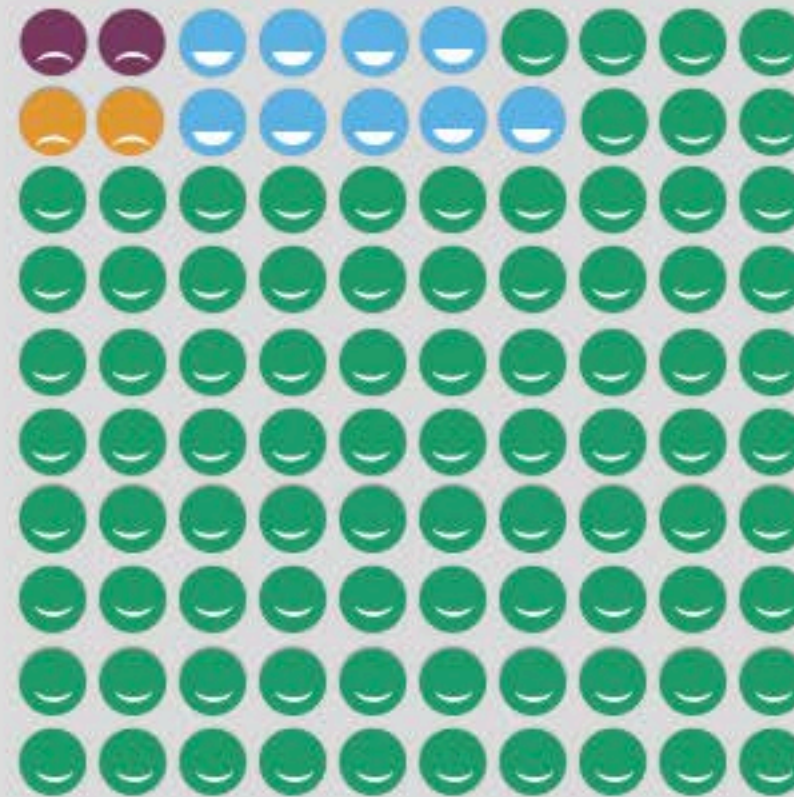

Over the next 5 years

**96** people will have no stroke

**2** people will have a fatal or disabling stroke

**2** people will have a non-disabling stroke

**9** people will avoid a stroke by taking anticoagulation

Credits & Contacts

Privacy policy (Updated October, 2014) Terms and conditions of use policy (Updated February 6, 2015)

LEGAL CONDITIONS AND TERMS OF USE APPLICABLE TO ALL USERS OF THIS SITE. ANY USE OF THIS SITE CONSTITUTES YOUR AGREEMENT TO THESE TERMS AND CONDITIONS OF USE.



Risk of Bleeding

Anticoagulation Routine

Reversing Anticoagulation

Cost

Diet & Medication Interactions

**Diet & Medication Interactions**

**Warfarin** ++++

Requires a stable diet.

Interacts with common foods, medications, and supplements.

**Direct Anticoagulants** +

Few interactions with food or medications.

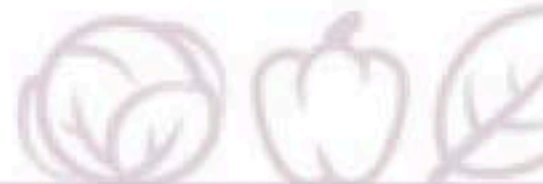

*Can you maintain the stable diet that Warfarin requires?*

**Anticoagulation Routine**

**Warfarin**  Once daily  Regular blood tests

**Direct Anticoagulants**

|             |                |            |    |
|-------------|----------------|------------|----|
| Apixaban    | <i>Eliquis</i> | AM         | PM |
| Dabigatran  | <i>Pradaxa</i> | AM         | PM |
| Edoxaban    | <i>Savaysa</i> | Once daily |    |
| Rivaroxaban | <i>Xarelto</i> | Once daily |    |

*Are you available to do the regular blood tests that Warfarin requires?*

Credits & Contacts

Privacy policy (Updated October, 2014) Terms and conditions of use policy (Updated February 6, 2015)

LEGAL CONDITIONS AND TERMS OF USE APPLICABLE TO ALL USERS OF THIS SITE. ANY USE OF THIS SITE CONSTITUTES YOUR AGREEMENT TO THESE TERMS AND CONDITIONS OF USE.

Risk of Bleeding

Anticoagulation Routine

Reversing Anticoagulation

Cost

Diet & Medication Interactions

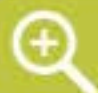

**Risk of Bleeding**

**When taking an Anticoagulant you may...**

- bruise more easily
- bleed more easily
- require emergency treatment for life-threatening bleeding

Risk of needing emergency treatment

**Reversing Anticoagulation**

**Warfarin**

Medications to reverse the effects of Warfarin are

**commonly available**

**Direct Anticoagulants**

Medications to reverse the effects of Direct Anticoagulants are

**not commonly available**

**Credits & Contacts**

Privacy policy (Updated October, 2014) Terms and conditions of use policy (Updated February 5, 2015)

LEGAL CONDITIONS AND TERMS OF USE APPLICABLE TO ALL USERS OF THIS SITE. ANY USE OF THIS SITE CONSTITUTES YOUR AGREEMENT TO THESE TERMS AND CONDITIONS OF USE.



- 1 Year Risk
- 5 Year Risk

Risk of Bleeding

Anticoagulation Routine

Reversing Anticoagulation

Cost

Diet & Medication Interactions

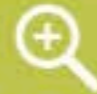

### Five Year Risk of Bleeding

#### For Average Risk

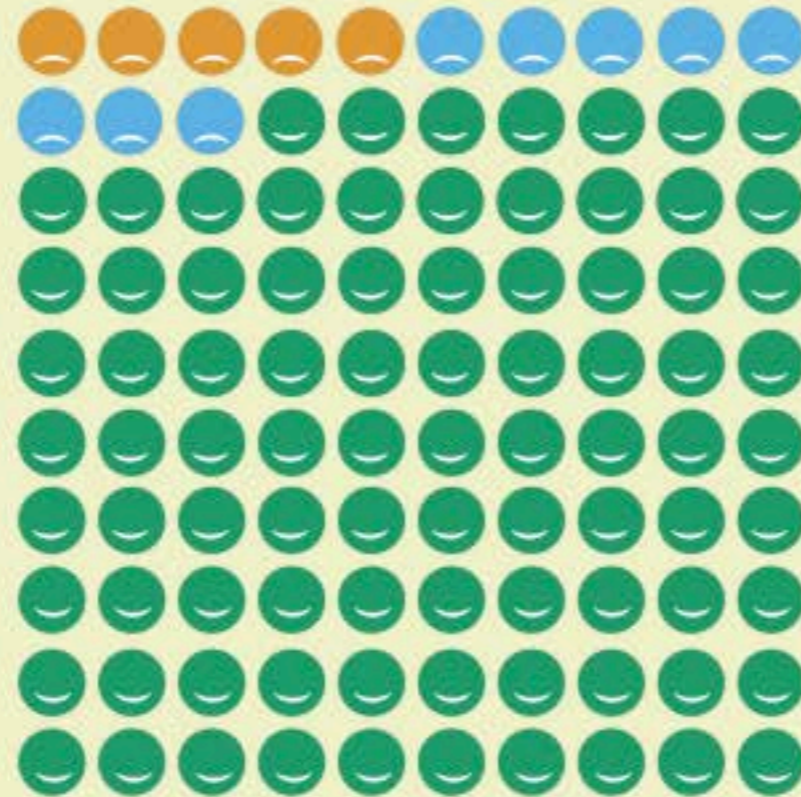

Exit

In 100 people, over the next 5 years...

**87** people will not need emergency treatment for bleeding

**5** will need emergency treatment whether they take an anticoagulant or not

**8** more people will need emergency treatment because they take an anticoagulant

**Some bleeds are fatal**

Your risk may be different  
Discuss your risk factors

Credits & Contacts

Privacy policy (Updated October, 2014) Terms and conditions of use policy (Updated February 5, 2015)

LEGAL CONDITIONS AND TERMS OF USE APPLICABLE TO ALL USERS OF THIS SITE. ANY USE OF THIS SITE CONSTITUTES YOUR AGREEMENT TO THESE TERMS AND CONDITIONS OF USE.



- 1 Year Risk
- 5 Year Risk

Risk of Bleeding

Anticoagulation Routine

Reversing Anticoagulation

Cost

Diet & Medication Interactions

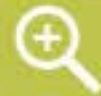

### Five Year Risk of Bleeding

#### Risk factors in your day-to-day life

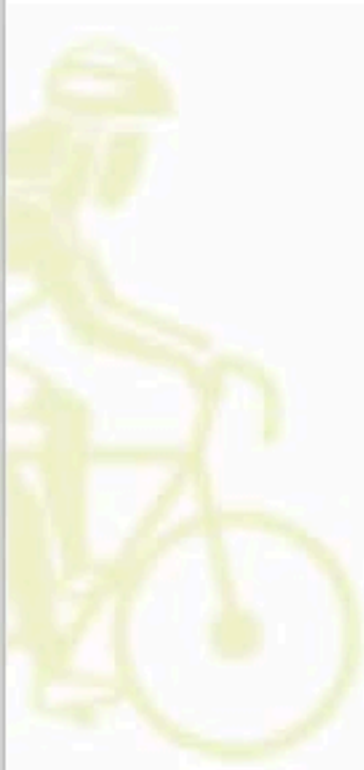

Are there activities at work, home or during recreation where you might fall or hurt yourself?

Exit

Discuss your medical risk factors

#### Credits & Contacts

Privacy policy (Updated October, 2014) Terms and conditions of use policy (Updated February 5, 2015)

LEGAL CONDITIONS AND TERMS OF USE APPLICABLE TO ALL USERS OF THIS SITE. ANY USE OF THIS SITE CONSTITUTES YOUR AGREEMENT TO THESE TERMS AND CONDITIONS OF USE.

1 Year Risk  
 5 Year Risk

Medical Situation Risk of Stroke Anticoagulation **Issues**

CHA<sub>2</sub>DS<sub>2</sub>-VASC **2**  
HAS-BLED **1**

Risk of Bleeding

Anticoagulation Routine

Reversing Anticoagulation

Cost

Diet & Medication Interactions

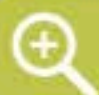

**Risk of Bleeding**

**Risk factors in your medical situation**

|                                      |                             |
|--------------------------------------|-----------------------------|
| Age                                  | <input type="text"/>        |
| Uncontrolled Hypertension            | <input type="checkbox"/> No |
| Renal Disease                        | <input type="checkbox"/> No |
| Liver Disease                        | <input type="checkbox"/> No |
| History of Stroke                    | <input type="checkbox"/> No |
| Prior, or Predisposition to Bleeding | <input type="checkbox"/> No |
| Unstable or High INR                 | <input type="checkbox"/> No |
| Medication Predisposing Bleeding     | <input type="checkbox"/> No |
| More than 8 Drinks per Week          | <input type="checkbox"/> No |

Exit

Medical factors associated with bleeding may put you at

- Lower than Average Risk
- Average Risk
- Higher than Average Risk

**Credits & Contacts**

Privacy policy (Updated October, 2014) Terms and conditions of use policy (Updated February 5, 2015)

LEGAL CONDITIONS AND TERMS OF USE APPLICABLE TO ALL USERS OF THIS SITE. ANY USE OF THIS SITE CONSTITUTES YOUR AGREEMENT TO THESE TERMS AND CONDITIONS OF USE.



1 Year Risk  
 5 Year Risk

Medical Situation Risk of Stroke Anticoagulation **Issues**

CHA<sub>2</sub>DS<sub>2</sub>-VASC **2**  
HAS-BLED **3**

Risk of Bleeding

Anticoagulation Routine

Reversing Anticoagulation

Cost

Diet & Medication Interactions

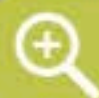

### Five Year Risk of Bleeding

#### Risk factors in your medical situation

- Age
- Uncontrolled Hypertension  Yes  No
- Renal Disease  Yes  No
- Liver Disease  Yes  No
- History of Stroke  Yes  No
- Prior, or Predisposition to Bleeding  Yes  No
- Unstable or High INR  Yes  No
- Medication Predisposing Bleeding  Yes  No
- More than 8 Drinks per Week  Yes  No

Exit

#### Higher than Average Risk

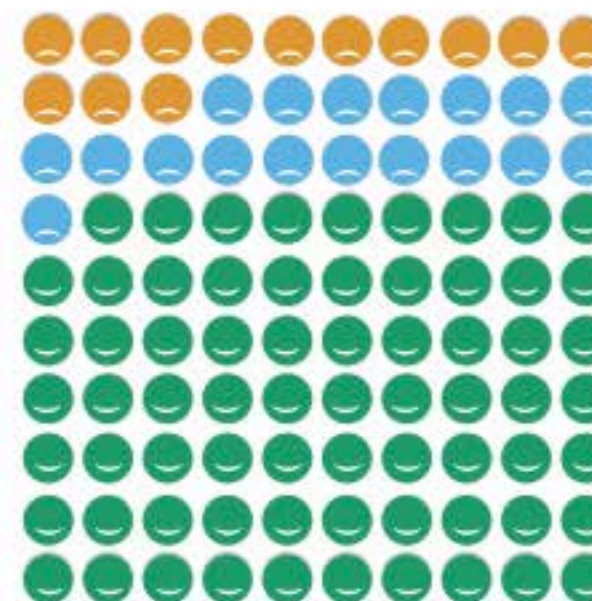

Over 5 years  
**18** more people out of 100 will need emergency treatment for bleeding because they take an anticoagulant. Some bleeds are fatal

- serious bleed **without** anticoagulation
- additional serious bleed **with** anticoagulation

#### Credits & Contacts

Privacy policy (Updated October, 2014) Terms and conditions of use policy (Updated February 6, 2015)

LEGAL CONDITIONS AND TERMS OF USE APPLICABLE TO ALL USERS OF THIS SITE. ANY USE OF THIS SITE CONSTITUTES YOUR AGREEMENT TO THESE TERMS AND CONDITIONS OF USE.
