# Supplementary material for: Shared decision making for stroke prevention in atrial fibrillation: study protocol for a randomized controlled trial
Source: Springer Nature journal article supplement (doi:10.1186/s13063-017-2178-y), 2017-09-29
Supplement: MOESM5 [file 15095032]

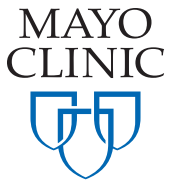

# Shared Decision Making for Stroke Prevention in Atrial Fibrillation

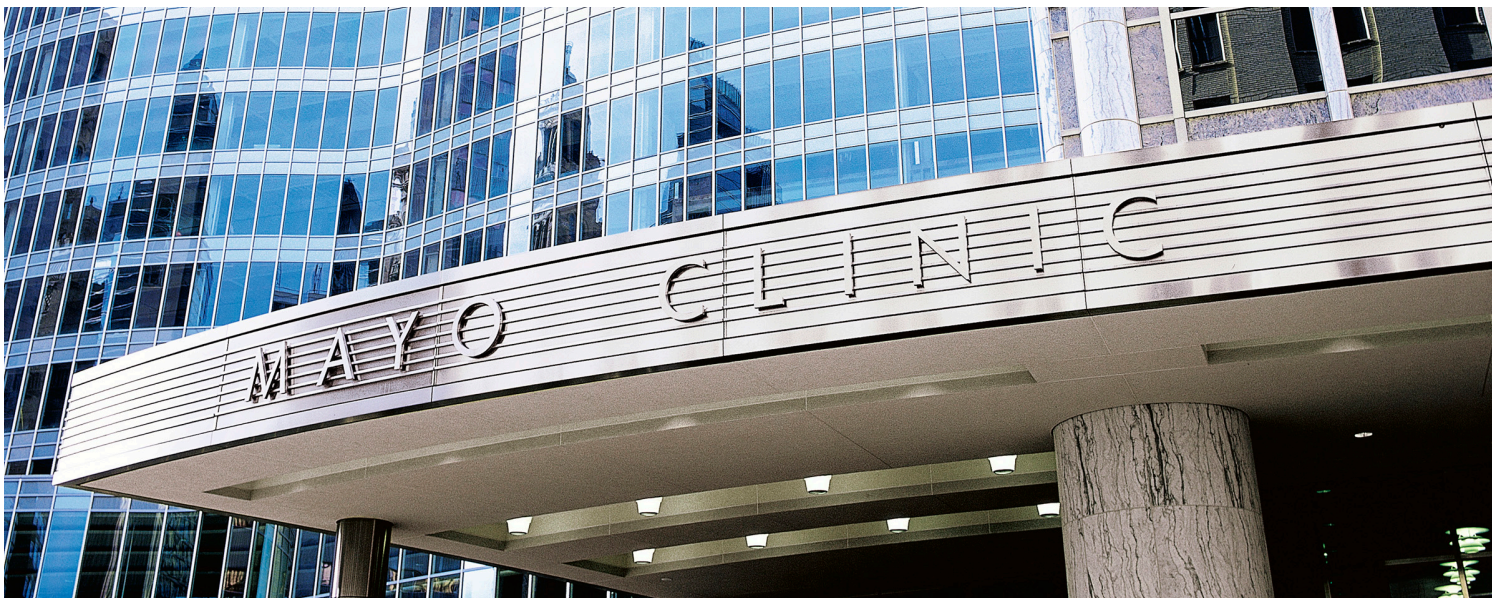

Survey Research Center

**Thank you for taking the time to complete this survey. Your answers are important to us. Please take the time to read and answer each question carefully by marking the box or providing the response that best represents your answers. Your responses are confidential and your clinician will not see your answers.**

**After completing this survey, please return it to the clinical staff that gave it to you. Please feel free to ask any questions you have while completing the survey.**

**Thank you.**

Patient ID: \_ \_ \_ \_ \_

**INSTRUCTIONS: PLEASE CHECK THE APPROPRIATE BOX OR FILL IN THE BLANK AS INDICATED.**

1. Today's Date:    \_ \_ / \_ \_ / \_ \_ \_ \_  
                          Month Day    Year

Below are some statements about blood thinners (anticoagulation medicines). Please show whether you think they are correct (True), not correct (False), or you are unsure (Do not know). This is not a test - what is important is that your answers reflect what you think is true about blood thinners (anticoagulation medicines).

- |                                                                                                                                                                                                      | True<br>▼                  | False<br>▼                 | Do not know<br>▼           |
|------------------------------------------------------------------------------------------------------------------------------------------------------------------------------------------------------|----------------------------|----------------------------|----------------------------|
| 2. Taking blood thinners can lower my risk of stroke. . . . .                                                                                                                                        | 1 <input type="checkbox"/> | 2 <input type="checkbox"/> | 3 <input type="checkbox"/> |
| 3. Taking blood thinners can increase my risk of bleeding. . . .                                                                                                                                     | 1 <input type="checkbox"/> | 2 <input type="checkbox"/> | 3 <input type="checkbox"/> |
| 4. Some, but not all, blood thinners require me to get periodic blood tests. . . . .                                                                                                                 | 1 <input type="checkbox"/> | 2 <input type="checkbox"/> | 3 <input type="checkbox"/> |
| 5. Blood thinners can be used to treat a stroke if I have one. . .                                                                                                                                   | 1 <input type="checkbox"/> | 2 <input type="checkbox"/> | 3 <input type="checkbox"/> |
| 6. Blood thinners must be taken daily. . . . .                                                                                                                                                       | 1 <input type="checkbox"/> | 2 <input type="checkbox"/> | 3 <input type="checkbox"/> |
| 7. I can safely eat whatever I want when taking Warfarin. . . .                                                                                                                                      | 1 <input type="checkbox"/> | 2 <input type="checkbox"/> | 3 <input type="checkbox"/> |
| 8. Of 100 people like me, the number expected to have a disabling or fatal stroke in the next year is: Provide a value between 0 - 100.                                                              |                            |                            |                            |
| _ _ _                                                                                                                                                                                                | 1 <input type="checkbox"/> | I don't know               |                            |
| 9. Which decision did you and your clinician make today about taking a blood thinner? (Please mark one.)                                                                                             |                            |                            |                            |
| 1 <input type="checkbox"/> Start or continue taking the blood thinner Warfarin                                                                                                                       |                            |                            |                            |
| 2 <input type="checkbox"/> Start or continue taking one of the blood thinners known as direct anticoagulants: Apixaban (Eliquis), Dabigatran (Pradaxa), Edoxaban (Savaysa), or Rivaroxaban (Xarelto) |                            |                            |                            |
| 3 <input type="checkbox"/> Stop taking or not start any blood thinner                                                                                                                                |                            |                            |                            |
| 4 <input type="checkbox"/> Make a decision at some other time                                                                                                                                        |                            |                            |                            |
| 5 <input type="checkbox"/> Other decision, please specify: _____                                                                                                                                     |                            |                            |                            |
| 10. Was the cost of the blood thinner (anticoagulant medicine) a factor in your decision?                                                                                                            |                            |                            |                            |
| 1 <input type="checkbox"/> No, cost did not matter                                                                                                                                                   |                            |                            |                            |
| 2 <input type="checkbox"/> Yes, cost was one factor I considered in my decision                                                                                                                      |                            |                            |                            |
| 3 <input type="checkbox"/> Yes, cost was the sole factor in my decision                                                                                                                              |                            |                            |                            |

Now, thinking about the decision you made with your clinician about blood thinners today, please look at the following comments that some people have made when deciding about blood thinners to lower their risk of stroke. Please show how strongly you agree or disagree with these comments by checking the box that indicates your level of agreement.

|                                                                                                    | Strongly<br>agree          | Agree                      | Neither<br>agree nor<br>disagree | Disagree                   | Strongly<br>disagree       |
|----------------------------------------------------------------------------------------------------|----------------------------|----------------------------|----------------------------------|----------------------------|----------------------------|
| 11. I know which options are available to me....                                                   | 1 <input type="checkbox"/> | 2 <input type="checkbox"/> | 3 <input type="checkbox"/>       | 4 <input type="checkbox"/> | 5 <input type="checkbox"/> |
| 12. I know the benefits of each option.....                                                        | 1 <input type="checkbox"/> | 2 <input type="checkbox"/> | 3 <input type="checkbox"/>       | 4 <input type="checkbox"/> | 5 <input type="checkbox"/> |
| 13. I know the risks and side effects of each option.....                                          | 1 <input type="checkbox"/> | 2 <input type="checkbox"/> | 3 <input type="checkbox"/>       | 4 <input type="checkbox"/> | 5 <input type="checkbox"/> |
| 14. I am clear about which benefits matter most to me. ....                                        | 1 <input type="checkbox"/> | 2 <input type="checkbox"/> | 3 <input type="checkbox"/>       | 4 <input type="checkbox"/> | 5 <input type="checkbox"/> |
| 15. I am clear about which risks and side effects matter most to me. ....                          | 1 <input type="checkbox"/> | 2 <input type="checkbox"/> | 3 <input type="checkbox"/>       | 4 <input type="checkbox"/> | 5 <input type="checkbox"/> |
| 16. I am clear about which is more important to me (the benefits or the risks and side effects). . | 1 <input type="checkbox"/> | 2 <input type="checkbox"/> | 3 <input type="checkbox"/>       | 4 <input type="checkbox"/> | 5 <input type="checkbox"/> |
| 17. I have enough support from others to make a choice. ....                                       | 1 <input type="checkbox"/> | 2 <input type="checkbox"/> | 3 <input type="checkbox"/>       | 4 <input type="checkbox"/> | 5 <input type="checkbox"/> |
| 18. I am choosing without pressure from others.                                                    | 1 <input type="checkbox"/> | 2 <input type="checkbox"/> | 3 <input type="checkbox"/>       | 4 <input type="checkbox"/> | 5 <input type="checkbox"/> |
| 19. I have enough advice to make a choice.....                                                     | 1 <input type="checkbox"/> | 2 <input type="checkbox"/> | 3 <input type="checkbox"/>       | 4 <input type="checkbox"/> | 5 <input type="checkbox"/> |
| 20. I am clear about the best choice for me.....                                                   | 1 <input type="checkbox"/> | 2 <input type="checkbox"/> | 3 <input type="checkbox"/>       | 4 <input type="checkbox"/> | 5 <input type="checkbox"/> |
| 21. I feel sure about what to choose. ....                                                         | 1 <input type="checkbox"/> | 2 <input type="checkbox"/> | 3 <input type="checkbox"/>       | 4 <input type="checkbox"/> | 5 <input type="checkbox"/> |
| 22. This decision is easy for me to make.....                                                      | 1 <input type="checkbox"/> | 2 <input type="checkbox"/> | 3 <input type="checkbox"/>       | 4 <input type="checkbox"/> | 5 <input type="checkbox"/> |
| 23. I feel I have made an informed choice.....                                                     | 1 <input type="checkbox"/> | 2 <input type="checkbox"/> | 3 <input type="checkbox"/>       | 4 <input type="checkbox"/> | 5 <input type="checkbox"/> |
| 24. I expect to stick with my decision.....                                                        | 1 <input type="checkbox"/> | 2 <input type="checkbox"/> | 3 <input type="checkbox"/>       | 4 <input type="checkbox"/> | 5 <input type="checkbox"/> |
| 25. The decision shows what is important to me.                                                    | 1 <input type="checkbox"/> | 2 <input type="checkbox"/> | 3 <input type="checkbox"/>       | 4 <input type="checkbox"/> | 5 <input type="checkbox"/> |
| 26. I am satisfied with my decision.....                                                           | 1 <input type="checkbox"/> | 2 <input type="checkbox"/> | 3 <input type="checkbox"/>       | 4 <input type="checkbox"/> | 5 <input type="checkbox"/> |

Thinking of the conversation you just had with your clinician about blood thinners (anticoagulation medicines), please select the most appropriate response to each item below:

- |                                                                                                                                                                           | Yes,<br>definitely                                     | Yes,<br>somewhat                | No                                               |                                 |                            |                                                       |
|---------------------------------------------------------------------------------------------------------------------------------------------------------------------------|--------------------------------------------------------|---------------------------------|--------------------------------------------------|---------------------------------|----------------------------|-------------------------------------------------------|
| 27. Did your clinician explain things in a way that was easy to understand? .....                                                                                         | 1 <input type="checkbox"/>                             | 2 <input type="checkbox"/>      | 3 <input type="checkbox"/>                       |                                 |                            |                                                       |
| 28. Did your clinician listen carefully to you? .....                                                                                                                     | 1 <input type="checkbox"/>                             | 2 <input type="checkbox"/>      | 3 <input type="checkbox"/>                       |                                 |                            |                                                       |
| 29. Did your clinician show respect for what you had to say? ..                                                                                                           | 1 <input type="checkbox"/>                             | 2 <input type="checkbox"/>      | 3 <input type="checkbox"/>                       |                                 |                            |                                                       |
| <br>                                                                                                                                                                      |                                                        |                                 |                                                  |                                 |                            |                                                       |
| 30. Would you recommend the way that you and your clinician shared information about your blood thinners (anticoagulation medicines) to other patients?                   |                                                        |                                 |                                                  |                                 |                            |                                                       |
| 1 <input type="checkbox"/>                                                                                                                                                | 2 <input type="checkbox"/>                             | 3 <input type="checkbox"/>      | 4 <input type="checkbox"/>                       | 5 <input type="checkbox"/>      | 6 <input type="checkbox"/> | 7 <input type="checkbox"/>                            |
| Yes,<br>I would strongly<br>recommend it                                                                                                                                  |                                                        |                                 | Not sure<br>whether to<br>recommend it<br>or not |                                 |                            | No,<br>I would<br>strongly<br>recommend<br>against it |
| <br>                                                                                                                                                                      |                                                        |                                 |                                                  |                                 |                            |                                                       |
| 31. In general, would you say your health is:                                                                                                                             |                                                        |                                 |                                                  |                                 |                            |                                                       |
| 1 <input type="checkbox"/> Excellent                                                                                                                                      | 2 <input type="checkbox"/> Very good                   | 3 <input type="checkbox"/> Good | 4 <input type="checkbox"/> Fair                  | 5 <input type="checkbox"/> Poor |                            |                                                       |
| <br>                                                                                                                                                                      |                                                        |                                 |                                                  |                                 |                            |                                                       |
| 32. How many different medicines in total, prescription and over-the-counter, do you take per day? (Please count a medicine taken several times per day as one medicine.) |                                                        |                                 |                                                  |                                 |                            |                                                       |
| __ __ Number of different medicines per day                                                                                                                               | 1 <input type="checkbox"/> I do not take any medicines |                                 |                                                  |                                 |                            |                                                       |
| <br>                                                                                                                                                                      |                                                        |                                 |                                                  |                                 |                            |                                                       |
| 33. Are you currently taking any of the following medications?                                                                                                            |                                                        |                                 |                                                  |                                 |                            |                                                       |
| 1 <input type="checkbox"/> Aspirin                                                                                                                                        |                                                        |                                 |                                                  |                                 |                            |                                                       |
| 2 <input type="checkbox"/> NSAIDS (ibuprofen/Advil, naproxen/Aleve, indomethacin/Indocin, diclofenac/Voltaren)                                                            |                                                        |                                 |                                                  |                                 |                            |                                                       |
| 3 <input type="checkbox"/> Antiplatelet agents (clopidogrel/Plavix, ticagrelor/Brilinta, prasugrel/Effient)                                                               |                                                        |                                 |                                                  |                                 |                            |                                                       |
| 4 <input type="checkbox"/> No, I do not take any of these medications currently.                                                                                          |                                                        |                                 |                                                  |                                 |                            |                                                       |

34. Do you have a medical condition that increases your chance of bleeding?  
(i.e., anemia, history of gastric or intestinal ulcers, diverticulosis, hemophilia)

1  No

2  Yes

If yes, which of the bleeding conditions do you have?  
(Mark all that apply.)

1  Anemia

1  History of gastric or intestinal ulcers

1  Diverticulosis

1  Inherited condition of the blood system such as hemophilia

1  Other, please specify: \_\_\_\_\_

35. In a typical week (7-day period), how many alcoholic drinks do you consume?  
One drink is 12 ounces of beer, 5 ounces of wine or 1.5 ounces of hard alcohol.

\_\_ \_\_ Drinks per week

36. Have you ever had a bleeding event that required hospitalization?

1  No

2  Yes

If yes,

When was the most recent event: \_\_ \_\_ / \_\_ \_\_ \_\_ \_\_  
Month Year

What was the nature of the event: \_\_\_\_\_

37. Have you ever suffered a fall that has resulted in a major bleed, broken bone, head injury, or required hospitalization?

1  No

2  Yes

If yes, what was the nature of the most recent fall?  
\_\_\_\_\_

38. Do you reside in a long-term care facility (i.e., nursing home)?

1  No

2  Yes

39. Do you receive your primary healthcare needs at another healthcare organization than this one?

1  No

2  Yes

**FOR EACH OF THE FOLLOWING QUESTIONS, PLEASE CHECK THE BOX THAT BEST REFLECTS YOUR ANSWER.**

**40. How confident are you filling out medical forms by yourself?**

1  Not at all    2  A little bit    3  Somewhat    4  Quite a bit    5  Extremely

**41. When reading the newspaper, how helpful do you find tables and graphs that are parts of a story?**

1  Not at all helpful    2     3     4     5     6  Extremely helpful

**42. When people tell you the chance of something happening, do you prefer that they use words ("it rarely happens") or numbers ("there's a 1% chance")?**

1  Always prefer words    2     3     4     5     6  Always prefer numbers

**43. When you hear a weather forecast, do you prefer predictions using percentages (e.g., "there will be a 20% chance of rain today") or predictions using only words (e.g., "there is a small chance of rain today")?**

1  Always prefer percentages    2     3     4     5     6  Always prefer words

**44. How often do you find numerical information to be useful?**

1  Never    2     3     4     5     6  Very often

## SOME QUESTIONS ABOUT YOU . . .

**45. Are you currently:** (Please mark one.)

- 1  Married
- 2  Living with someone in a marriage-like relationship
- 3  Separated
- 4  Divorced
- 5  Widowed
- 6  Never married

**46. What is the highest level of schooling you have completed?** (Please mark one.)

- 1  Some high school or less
- 2  High school graduate or GED
- 3  Some college or associate's degree (including community college) or vocational technical, or business school degree
- 4  Four-year college graduate (bachelor's degree)
- 5  Graduate or professional school degree
- 6  Other, please specify: \_\_\_\_\_

**47. Which of the following categories best describes your household income last year before taxes?**

- 1  Less than \$20,000
- 2  \$20,000 to \$29,999
- 3  \$30,000 to \$39,999
- 4  \$40,000 to \$59,999
- 5  \$60,000 to \$79,999
- 6  \$80,000 to \$99,999
- 7  \$100,000 to \$149,999
- 8  \$150,000 to \$199,999
- 9  \$200,000 or more

**48. Are you of Hispanic, Latino, or Spanish origin?**

- 1  Yes (Mexican, Mexican American, Chicano, Puerto Rican, Cuban, Other)
- 2  No, not Hispanic, Latino, or Spanish origin

**49. What is your race?** (Mark all that apply.)

- 1  White
- 1  Black or African American
- 1  American Indian or Alaska Native
- 1  Asian
- 1  Native Hawaiian or other Pacific Islander
- 1  Other, please specify: \_\_\_\_\_



**Thank you for completing the survey!**  
**Please return it to the clinical support staff that asked you to complete it.**







(THIS PAGE IS FOR SURVEY RESEARCH TRACKING AND FILING PURPOSES ONLY)

SHARED DECISION MAKING FOR  
STROKE PREVENTION IN  
ATRIAL FIBRILLATION (THIRD)

INVESTIGATOR: MEGAN BRANDA

VERSION AS OF:  
SEPTEMBER 30, 2016 DDG  
OCTOBER 26, 2016 WLD  
NOVEMBER 11, 2016 DDG  
NOVEMBER 30, 2016 WLD

CODING CHECK:

INCLUDE:
